# Supplementary material for: Comparative Analysis of Maternal Colostrum and Colostrum Replacer Effects on Immunity, Growth, and Health of Japanese Black Calves
Source: MDPI journal article supplement (doi:10.3390/ani14020346), 2024-01-22
Supplement: s1 [file s1]

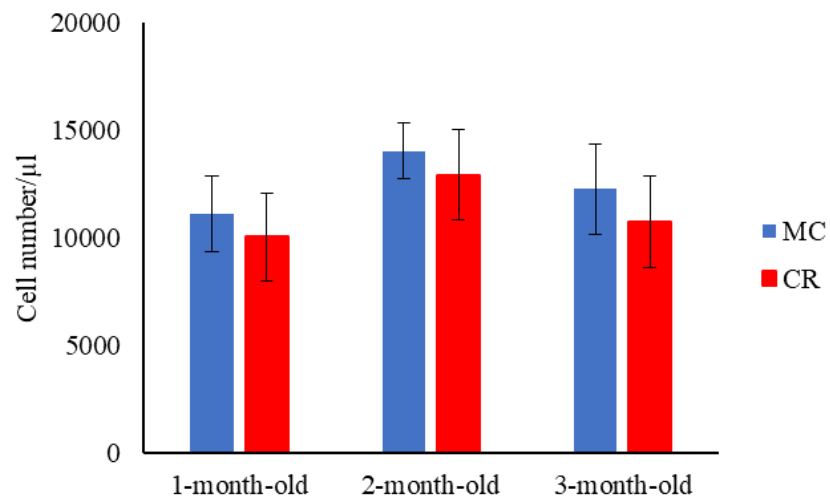

Figure S1: White blood cells (WBC) populations during one, two, and three-month-old in MC and CR group. No significant differences were observed between MC and CR group for WBC population during the period of study. Data are presented as the mean  $\pm$  SD
