# Supplementary material for: Comparative Analysis of Maternal Colostrum and Colostrum Replacer Effects on Immunity, Growth, and Health of Japanese Black Calves
Source: MDPI journal article supplement (doi:10.3390/ani14020346), 2024-01-22
Supplement: s1 [file s1]

Table S1: Daily feeding during pregnancy and after pregnancy for mother cow

| Period           | Hay (kg) | Concentrated food (kg) | TDN (%) | CP (%) |
|------------------|----------|------------------------|---------|--------|
| maintenance      | 6        | 1                      | 113     | 96     |
| end of pregnancy | 6        | 2.5                    | 112     | 94     |
| postpartum       | 6        | 1                      | 141     | 133    |

Table S2: Monoclonal Antibodies information for flowcytometry and phagocytosis

| Monoclonal Antibody | Specificity Marker | Clone  | Isotype | Fluorochrome      | Dilution |
|---------------------|--------------------|--------|---------|-------------------|----------|
| Anti CD4            | CD4                | ILA11A | IgG2a   | FITC              | 200      |
| Anti CD8            | CD8                | CC63   | IgG2a   | HiLyte™ Fluor 555 | 200      |
| Anti $\gamma\delta$ | $\gamma\delta$     | GB21A  | IgG2b   | HiLyte™ Fluor 647 | 200      |
| Anti IgM            | IgM                | BIG73A | IgG1    | HiLyte™ Fluor 555 | 100      |
| Anti MHC II         | MHC class II       | TH14B  | IgG2a   | HiLyte™ Fluor 647 | 200      |
| Granulocyte         | IgM                | CH138A | IgM     | HiLyte™ Fluor 555 | 100      |
